# Supplementary material
Source: publisher site journal article supplement (http://kjim.org/upload/media/kjim-2019-308-suppl5.pdf)
Supplement: Supplementary file 1 [file kjim-2019-308-suppl5.pdf]

**Supplementary Table 5. Incidence rates and HR for primary composite outcome and each outcome among patients with definite spasm**

| Variable          | No. | Event (%) | Person-month | Incidence rate | 95% CI     | p value <sup>a</sup> | HR <sup>b</sup> | 95% CI     | p value <sup>b</sup> |
|-------------------|-----|-----------|--------------|----------------|------------|----------------------|-----------------|------------|----------------------|
| Composite outcome |     |           |              |                |            | 0.1218               |                 |            |                      |
| Diltiazem         | 479 | 28 (5.85) | 11,747       | 2.38           | 1.65–3.45  |                      | Reference       |            |                      |
| Amlodipine        | 66  | 2 (3.0)   | 1,268        | 1.58           | 0.39–6.31  |                      | 0.55            | 0.13–2.30  | 0.411                |
| Nifedipine        | 52  | 7 (13.46) | 1,341        | 5.22           | 2.49–10.95 |                      | 2.30            | 1.00–5.26  | 0.049                |
| Benidipine        | 24  | 1 (4.17)  | 895          | 1.12           | 0.16–7.93  |                      | 0.67            | 0.09–4.93  | 0.695                |
| Arrhythmia        |     |           |              |                |            | 0.5591               |                 |            |                      |
| Diltiazem         | 479 | 10 (2.09) | 12,335       | 0.81           | 0.44–1.51  |                      | Reference       |            |                      |
| Amlodipine        | 66  | 0         | 1,303        | 0.00           | -          |                      | -               |            |                      |
| Nifedipine        | 52  | 2 (3.85)  | 1,489        | 1.34           | 0.34–5.37  |                      | 1.73            | 0.38–7.91  | 0.478                |
| Benidipine        | 24  | 1 (4.17)  | 895          | 1.12           | 0.16–7.93  |                      | 1.78            | 0.23–13.95 | 0.581                |
| ACS               |     |           |              |                |            | 0.3465               |                 |            |                      |
| Diltiazem         | 479 | 20 (4.18) | 12,216       | 1.64           | 1.06–2.54  |                      | Reference       |            |                      |
| Amlodipine        | 66  | 1 (1.52)  | 1,307        | 0.77           | 0.11–5.43  |                      | 0.46            | 0.06–3.44  | 0.451                |
| Nifedipine        | 52  | 4 (7.69)  | 1,498        | 2.67           | 1.00–7.12  |                      | 1.61            | 0.55–4.73  | 0.383                |
| Benidipine        | 24  | 0         | 948          | 0.00           | -          |                      | -               |            |                      |
| Death             |     |           |              |                |            | 0.4358               |                 |            |                      |
| Diltiazem         | 479 | 2 (0.42)  | 12,549       | 0.16           | 0.04–0.64  |                      | Reference       |            |                      |
| Amlodipine        | 66  | 1 (1.52)  | 1,326        | 0.75           | 0.11–5.35  |                      | 4.17            | 0.38–46.02 | 0.244                |
| Nifedipine        | 52  | 1 (1.92)  | 1,549        | 0.65           | 0.09–4.58  |                      | 4.22            | 0.38–46.55 | 0.240                |
| Benidipine        | 24  | 0         | 948          | 0.00           | -          |                      | -               |            |                      |

HR, hazard ratio; CI, confidence interval; ACS, acute coronary syndrome.

<sup>a</sup>p value by log rank test.

<sup>b</sup>p value by univariate Cox proportional hazard regression.
